# Supplementary material for: Associations between hepatic miRNA expression, liver triacylglycerols and gut microbiota during metabolic adaptation to high-fat diet in mice
Source: Springer Nature journal article supplement (doi:10.1007/s00125-017-4209-3), 2017-01-19
Supplement: MOESM1 [file 12010438]

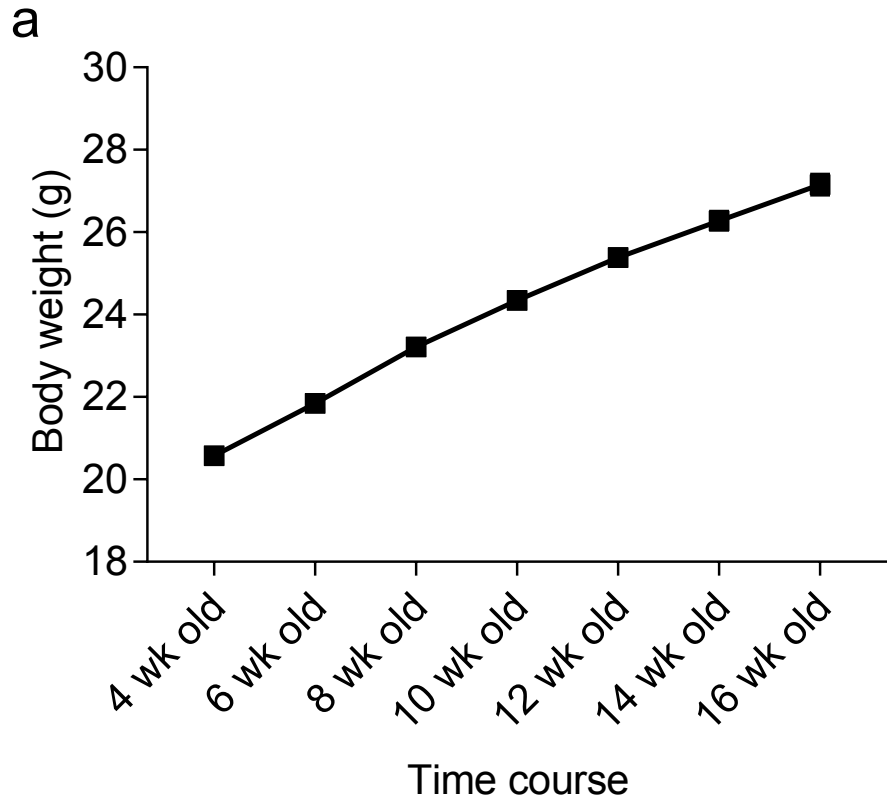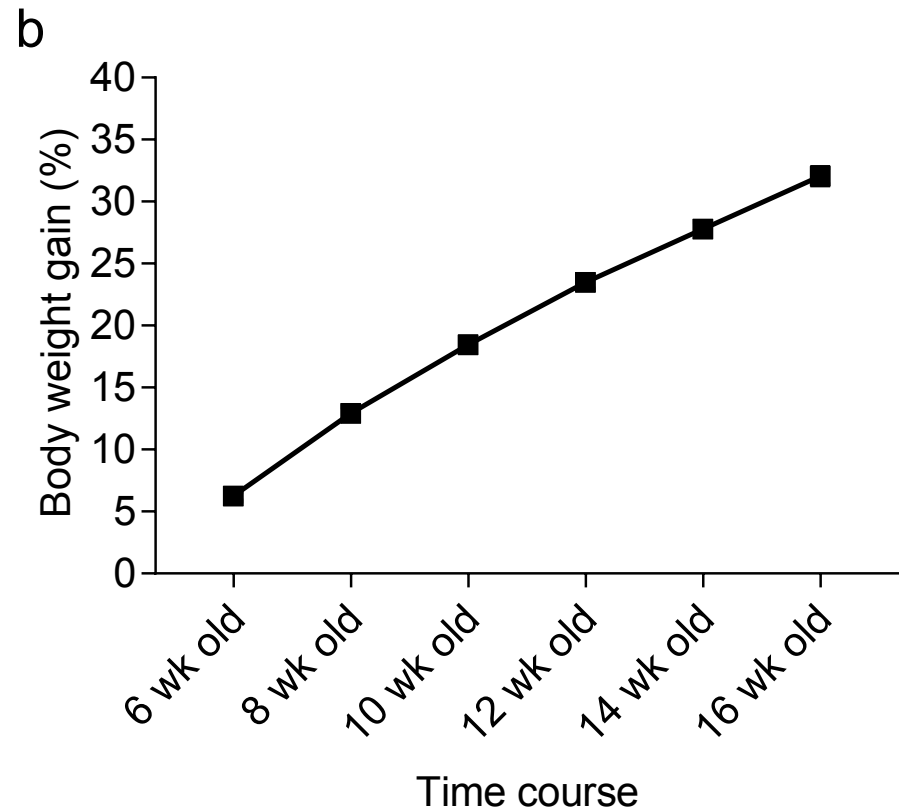

ESM Fig.1

**ESM Figure 1. Body weight trend over 3 months during metabolic adaptation to a HFD.** Body weight trend in grams (a) and body weight gain as percentage (b).
